# Supplementary material for: White-light-emitting Ln-hydrogels with multi-stimuli responsiveness and applications in environmental sensing and anti-counterfeiting
Source: Royal Society of Chemistry journal article supplement (doi:10.1039/d3cp01121f), 2023-01-01
Supplement: d3cp01121f1.pdf [file d3cp01121f1.pdf]

**Supporting Information for**

**White-Light-Emitting Lanthanide Metallohydrogel with Multi-Stimuli  
Responsiveness Using for Environmental Sensing and Anti-Counterfeit**

Xiao-Juan Wang <sup>a</sup>, Hong-Lin Mo <sup>a</sup>, Chuan-Wan Wei <sup>a\*</sup>, Shu-Qin Gao <sup>b</sup>, and Ying-Wu Lin <sup>a,b\*</sup>

*<sup>a</sup>School of Chemistry and Chemical Engineering, University of South China, Hengyang 421001, China; <sup>b</sup>Key Lab of Protein Structure and Function of Universities in Hunan Province, University of South China, Hengyang 421001, China.*

Corresponding authors:

\*E-mail: weichw@hotmail.com (C.-W. Wei); ywlin@usc.edu.cn (Y.-W. Lin)

## Contents

### 1. Experimental Section

#### 1.1 Materials

6-methoxypicolinaldehyde, L-phenylalanine and sodium borohydride ( $\text{NaBH}_4$ ) were purchased from Aladin Reagent (Shanghai, China). All the other salts were of analytical grade, which includes  $\text{KOH}$ ,  $\text{Na}_2\text{CO}_3$ ,  $\text{CaCl}_2$ ,  $\text{FeCl}_3 \cdot 2\text{H}_2\text{O}$ ,  $\text{MgCl}_2$ ,  $\text{CuCl}_2 \cdot 2\text{H}_2\text{O}$ ,  $\text{ZnSO}_4 \cdot 6\text{H}_2\text{O}$ ,  $\text{MnSO}_4$ ,  $\text{KCl}$ ,  $\text{NaCl}$ ,  $\text{La}(\text{NO}_3)_3 \cdot 6\text{H}_2\text{O}$ ,  $\text{Eu}(\text{NO}_3)_3 \cdot 6\text{H}_2\text{O}$ ,  $\text{Tb}(\text{NO}_3)_3 \cdot 6\text{H}_2\text{O}$ ,  $\text{CdCl}_2 \cdot 6\text{H}_2\text{O}$ ,  $\text{BaCl}_2 \cdot 6\text{H}_2\text{O}$ . All chemicals were used without further purification.

#### 1.2 Instruments

$^1\text{H}$  NMR data were obtained on Bruker 500 MHz spectrometer in  $\text{D}_2\text{O}$ . The mass spectra were collected on G2-XS QTOF mass spectrometry. FT-IR spectra were obtained on a Perkin-Elmer Spectrum GX. Fluorescence measurements were recorded on a F-7000, Hitachi fluorescence spectrometer. Isothermal titration calorimetry (ITC) experiments were carried out on a Microcal VP-ITC microcalorimeter. Scanning electron microscope (SEM) images and Transmission electron microscope (TEM) images were obtained on a FEI HELIOS NanoLab 600i SEM (America) and a FEI Titan microscope (America), respectively.

#### 1.3 Synthesis of MPF

Adding an aqueous solution of L-phenylalanine (10 mmol) containing 10 mmol potassium hydroxide to a flask, and then the ethanol solution of 6-methoxypicolinaldehyde (10 mmol) was dripped to the system. The mixture was stirred at  $50\text{ }^\circ\text{C}$  for 4 h and then cooled in an ice bath. 6 mmol sodium borohydride was added to the mixed solution and kept stirring for 5 h. Finally, the reaction mixture was neutralized to nearly neutral with  $\text{HCl}$ . The resulted solid was filtered off, and washed with the mixture of ethanol and water, and then dried.

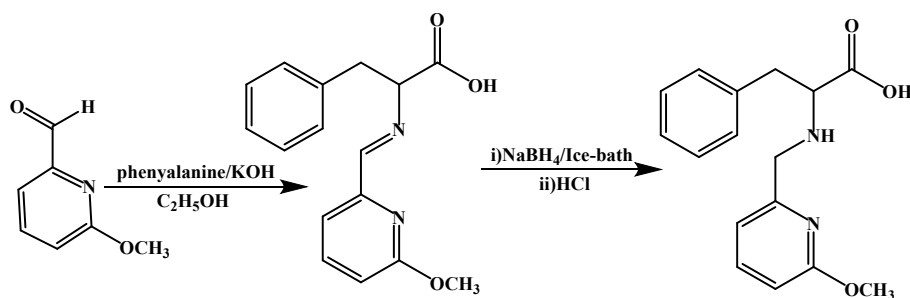

**Scheme S1** The synthetic route of MPF.

#### 1.4 Fluorescence studies

Fluorescence spectra were obtained on a fluorescence spectrometer (F-7000, Hitachi). The emission spectra of MPF, MPF-Eu, MPF-Tb and MPF-Eu/Tb were measured by diluting the fresh gel 50 times ( $\lambda_{\text{ex}} = 295$  nm, ex slit 10 nm, em slit 10 nm, voltage 550 V). For Job's plot, the total concentration of MPF and  $\text{Ln}^{3+}$  were kept constant (the total concentration of MPF and  $\text{Ln}^{3+}$  ( $\text{Eu}^{3+}/\text{Tb}^{3+}=7:3$ ) was 1 mM) and their mole fractions varied in the range of 0-1. In  $\text{Ln}^{3+}$  titration, 5  $\mu\text{L}$   $\text{Ln}^{3+}$  (0.1 M) was added to MPF solution (20 mM) continuously until the concentration of  $\text{Ln}^{3+}$  reached 10 mM. During the temperature responsive fluorescence test, the diluted gels were first incubated in water bath or ice bath to a certain temperature (0-60 °C) before fluorescence detection and then were transferred quickly to the detection tank for testing. The responsiveness for various metal ions of WLE hydrogel was tested. The fluorescence spectra were obtained by adding various metal ions (10 mM) to diluted MPF-Eu<sub>0.7</sub>/Tb<sub>0.3</sub> gels. Unless otherwise indicated, the excitation wavelength of fluorescence detection mentioned in this paper is 295 nm.

Quantum yield (QY) is defined as the ratio of the emitted photons to the absorbed photons, and was measured by a spectrofluorometer (FLS1000). An integrating sphere was mounted on the spectrofluorometer with the entrance and exit ports located in 90° geometry. The sample was located in the center of the integrating sphere. All the recorded spectroscopic data were corrected for the spectral responses of both the spectrofluorometer and the integrating sphere. The responses of the detecting systems (integrating sphere, monochromators and detectors) in photon flux were determined using a calibrated tungsten lamp. QY is calculated by the following equation:

$$\eta = \frac{\text{number of photons emitted}}{\text{number of photons absorbed}} = \frac{L_{\text{sample}}}{E_{\text{reference}} - E_{\text{sample}}} \quad (1)$$

where  $\eta$  represents QY,  $L_{\text{sample}}$  the emission intensity,  $E_{\text{reference}}$  and  $E_{\text{sample}}$  the intensities of the excitation light not absorbed by the reference and the sample respectively. The precursor glass was used as the standard reference. The difference in integrated areas between the sample and the reference represents the number of the absorbed photons. The photons emitted were determined by integrating the area of the emission band. The quantum yield is obtained through directly from the

software that comes with the instrument (Edinburgh FLS1000).

Fluorescence lifetime test was performed on Edinburgh FLS1000 spectrofluorometer. The test condition: Excitation light source ( $\mu\text{F}$ ), Intensity (100),  $\lambda_{\text{ex}} = 295 \text{ nm}$ , Bandwidth (1 nm), Detector (PMT-900), Monitored emission wavelength (420 nm, 550 nm, 620 nm). The average fluorescence lifetime was calculated using 3 order exponentials (shown in the equation 2).

$$\tau = \frac{A_1\tau_1^2 + A_2\tau_2^2 + A_3\tau_3^2}{A_1\tau_1 + A_2\tau_2 + A_3\tau_3} \quad (2)$$

### 1.5 ITC studies

Isothermal titration calorimetry (ITC) measurements were performed on a Microcal VP-ITC microcalorimeter (GE Life Sciences). MPF and  $\text{Ln}^{3+}$  ( $\text{Eu}^{3+}$  or  $\text{Tb}^{3+}$ ) solutions are completely degassed in a Thermo Val instrument (Microcal). In the titration experiment,  $\text{Ln}^{3+}$  (1 mM) solution was injected into  $\sim 1.5 \text{ mL}$  of MPF (15 mM) for 25 consecutive injections (2  $\mu\text{L}$  for the first injection and 10  $\mu\text{L}$  for the subsequent injection) with a 150 sec interval between each injection. The reaction cell was continuously stirred at 502 rpm and the heat change was recorded at 25 °C. The data were analyzed in Origin 9.0 software (GE Life Sciences), the combined isotherm was fitted into a unit point model, and net reaction heat was obtained from the integration of the calorimetric traces.

### 1.6 EPR studies

Electron paramagnetic resonance (EPR) spectra were recorded on a Bruker A300 spectrometer (X-band) equipped with a Bruker ER4141VTM liquid  $\text{N}_2$  system. The samples were transferred to quartz EPR tubes (Wilmad, 707-SQ) and frozen in liquid  $\text{N}_2$ . The spectra were then measured at 100 K, with a frequency of 9.238 GHz, center field of 3000 G, sweep width of 1100 G, microwave power 1 mW, modulation frequency, 100 kHz and modulation amplitude of 3.0 G. The EPR studies were performed for  $\text{Cu}^{2+}$ , MPF-Eu/Tb, MPF-Eu/Tb + various metal ions including  $\text{Cu}^{2+}$ .

| MPF (5 mM)<br>pH = 10 | Eu (NO <sub>3</sub> ) <sub>3</sub> (5 mM) | [Tb (NO <sub>3</sub> ) <sub>3</sub> ] (5 mM) | Glycerol (50%) | CuSO <sub>4</sub> (5 mM) | Other metal ions (5 mM)    |
|-----------------------|-------------------------------------------|----------------------------------------------|----------------|--------------------------|----------------------------|
| 200 μL                | 70 μL                                     | 30 μL                                        | 75 μL          | -                        | -                          |
| 200 μL                | 70 μL                                     | 30 μL                                        | 75 μL          | -                        | [Pb <sup>2+</sup> ] 100 μL |
| 200 μL                | 70 μL                                     | 30 μL                                        | 75 μL          | -                        | [Bb <sup>2+</sup> ] 100 μL |
| 200 μL                | 70 μL                                     | 30 μL                                        | 75 μL          | -                        | [Zn <sup>2+</sup> ] 100 μL |
| 200 μL                | 70 μL                                     | 30 μL                                        | 75 μL          | -                        | [Mg <sup>2+</sup> ] 100 μL |
| 200 μL                | 70 μL                                     | 30 μL                                        | 75 μL          | -                        | [K <sup>+</sup> ] 100 μL   |
| 200 μL                | 70 μL                                     | 30 μL                                        | 75 μL          | -                        | [La <sup>3+</sup> ] 100 μL |
| 200 μL                | 70 μL                                     | 30 μL                                        | 75 μL          | -                        | [Li <sup>+</sup> ] 100 μL  |
| 200 μL                | 70 μL                                     | 30 μL                                        | 75 μL          | -                        | [Na <sup>+</sup> ] 100 μL  |
| 200 μL                | 70 μL                                     | 30 μL                                        | 75 μL          | 100 μL                   | -                          |
| 0                     | 0                                         | 0                                            | 75 μL          | 100 μL                   | H <sub>2</sub> O 300 μL    |

## 2. Supplementary Figures

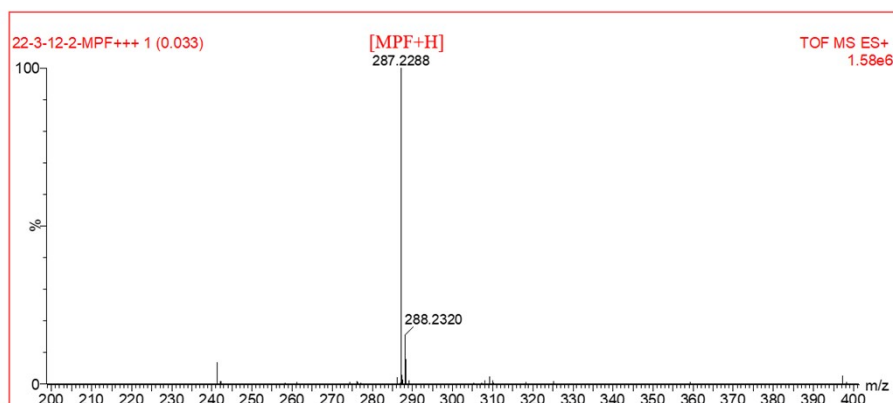

**Fig. S1** ESI-MS spectra of compound MPF, Calculated: 286.3 Da; Observed: 287.2 Da ([MPF +H]).

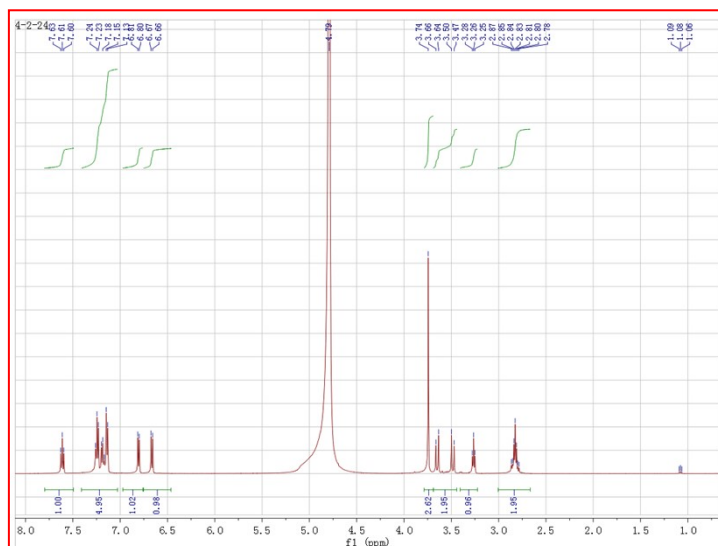

**Fig. S2**  $^1\text{H}$  NMR spectrum of MPF in  $\text{D}_2\text{O}$ .  $^1\text{H}$  NMR (500 MHz,  $\text{D}_2\text{O}$ )  $\delta$  7.61 (d,  $J = 6.0$  Hz, 1H), 7.21-7.26 (m, 5H), 6.80 (d,  $J = 7.0$  Hz, 1H), 6.67 (d,  $J = 7.0$  Hz, 1H), 3.74 (s, 3H), 3.56 (dd,  $J = 80, 10.0$  Hz, 2H), 3.26 (t,  $J = 6.5$  Hz, 1H), 2.83 (m, 2H), 1.08 (t,  $J = 7.0$  Hz, 1H).

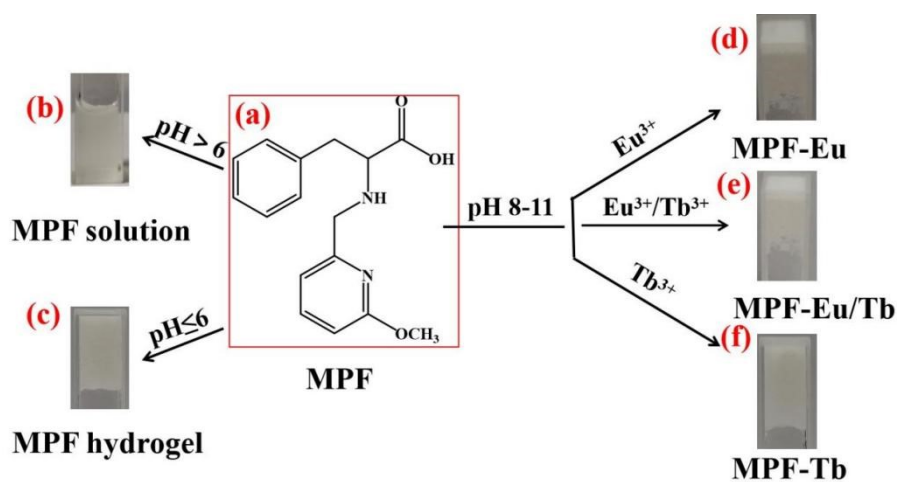

**Fig. S3** (a) The molecular structure of MPF, (b) (c) (d) (e) (f) Photos under sunlight of MPF solution, MPF hydrogel, MPF-Eu, MPF-Eu<sub>0.7</sub>/Tb<sub>0.3</sub>, and MPF-Tb metallogels. ( $C_{\text{MPF}} = 0.1$  M, the molar ratio of MPF and  $\text{Ln}^{3+}$  is 2:1.)

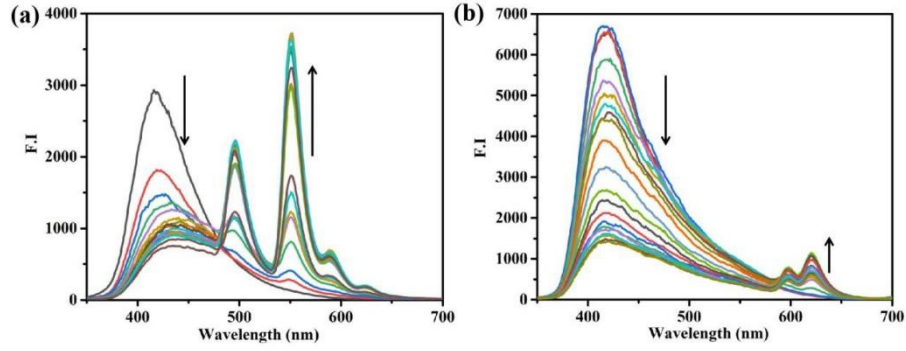

**Fig. S4** Fluorescence spectra of MPF changed with the concentrations of (a)  $Tb^{3+}$  and (b)  $Eu^{3+}$ . ( $\lambda_{ex} = 295$  nm).

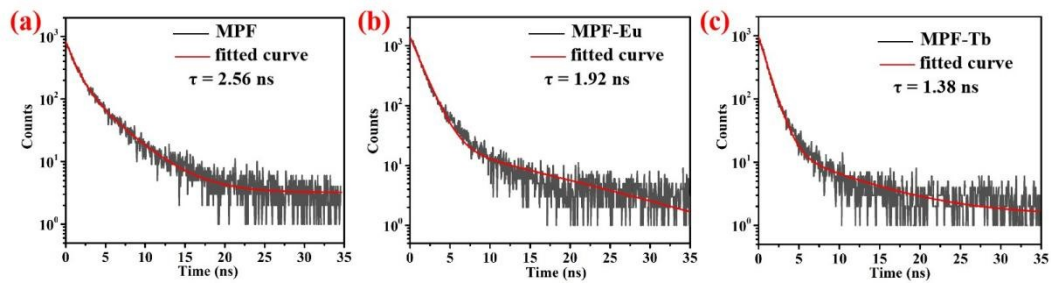

**Fig. S5** Fluorescent decay curves of MPF, MPF-Eu, MPF-Tb xerogels at emission wavelength 420 nm ( $\lambda_{ex} = 295$  nm).

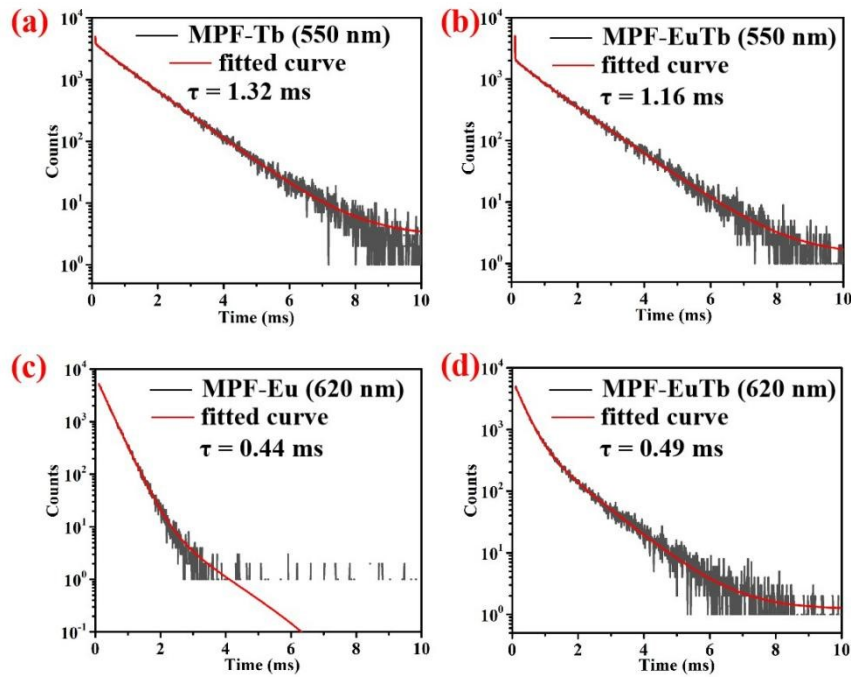

**Fig. S6** Fluorescent decay curves with emission wavelength 550 nm ((a) MPF-Tb, (b) MPF- $Eu_{0.7}/Tb_{0.3}$  xerogel) and 620 nm (c) MPF-Eu, (d) MPF- $Eu_{0.7}/Tb_{0.3}$  xerogel). ( $\lambda_{ex} = 295$  nm)

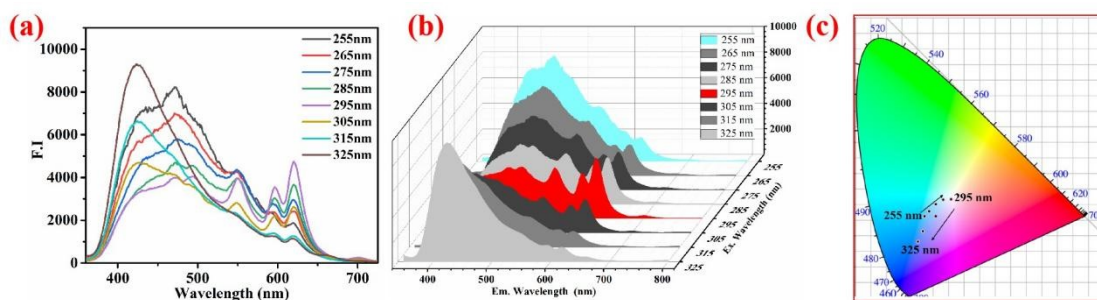

**Fig. S7** (a) The fluorescence spectra of WLE hydrogel MPF-Eu<sub>0.7</sub>/Tb<sub>0.3</sub> at different excitation wavelengths. (b) The fluorescence emission spectra, (c) the CIE chromaticity diagram of MPF-Eu/Tb at different excitation wavelengths (255 nm, 265 nm, 275 nm, 285 nm, 295 nm, 305 nm, 315 nm, 325 nm).

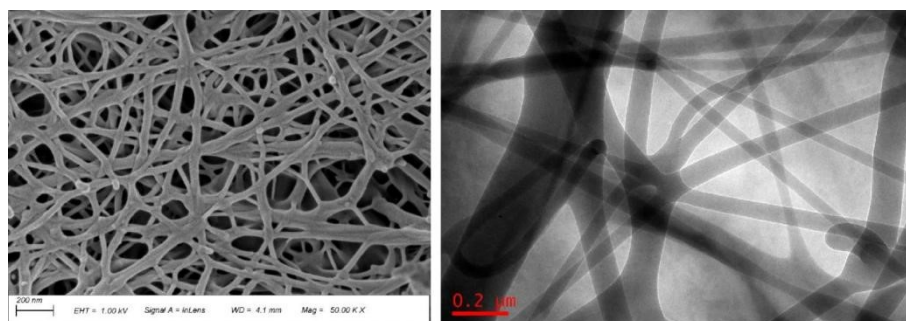

**Fig. S8** SEM and TEM images of MPF hydrogel.

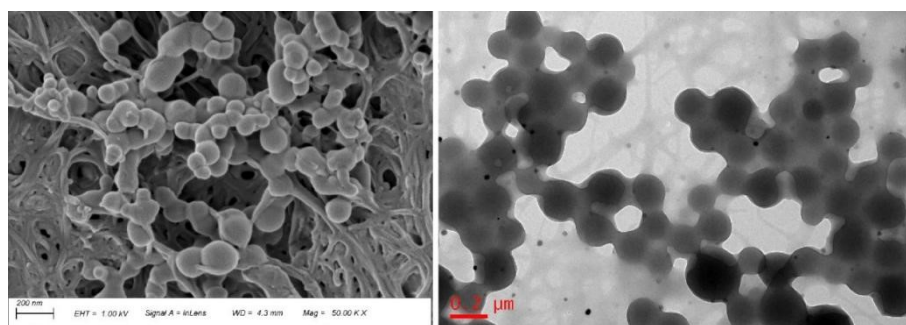

**Fig. S9** SEM and TEM images of MPF-Eu xerogel.

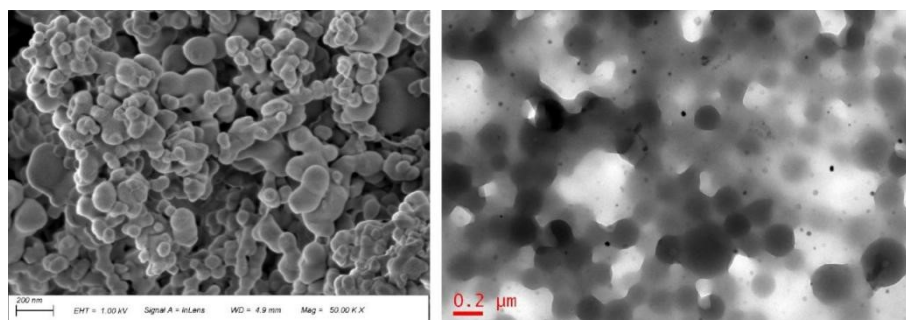

**Fig. S10** SEM and TEM images of MPF-Tb xerogel.



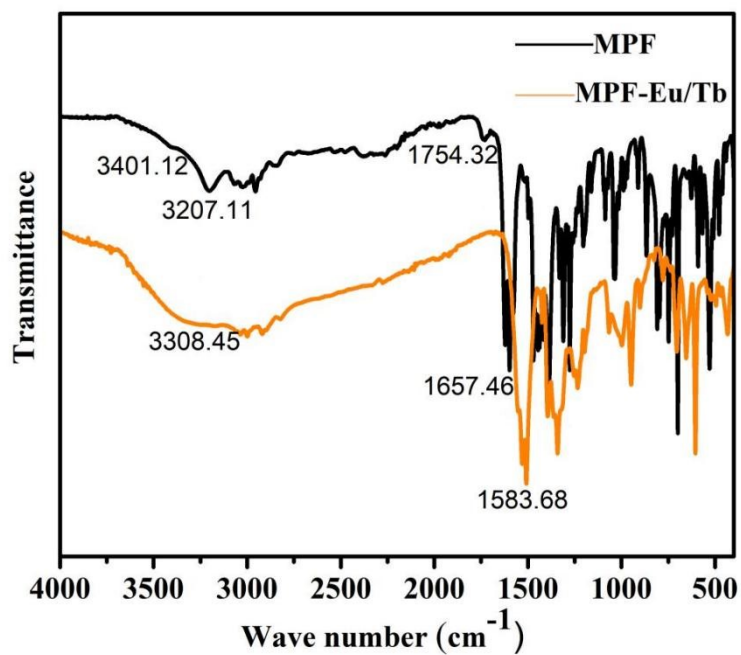

**Fig. S11** FT-IR spectra of MPF and MPF-Eu<sub>0.7</sub>/Tb<sub>0.3</sub> xerogels.

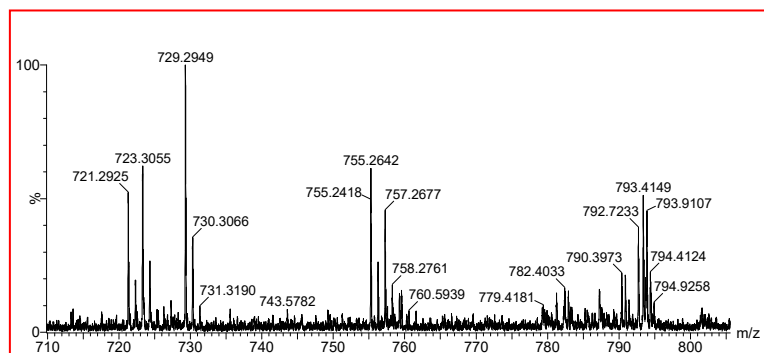

**Fig. S12** ESI-MS spectra of MPF-Eu<sub>0.7</sub>/Tb<sub>0.3</sub> complex, Calculated: 722.2 Da ([Eu(MPF)<sub>2</sub>]) and 729.2 Da ([Tb(MPF)<sub>2</sub>]); Observed: 723.3 Da ([Eu(MPF)<sub>2</sub>]+H) and 730.3 Da ([Tb(MPF)<sub>2</sub>]+H).

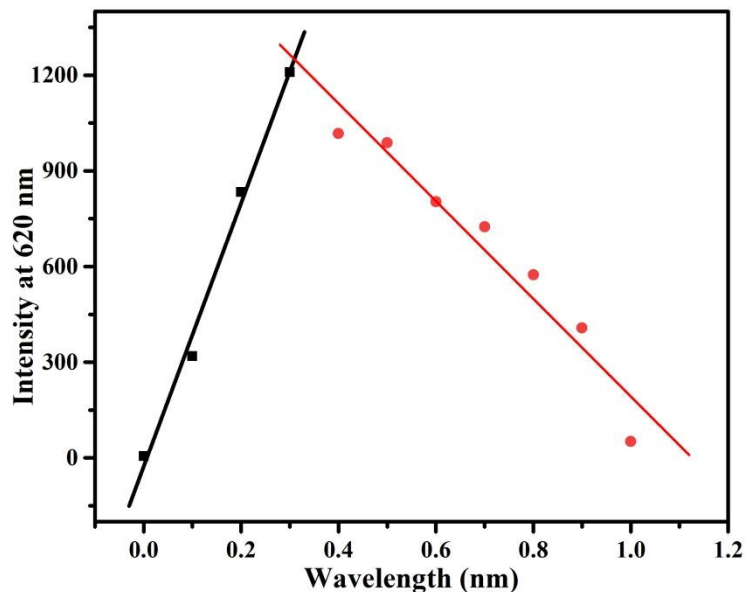

**Fig. S13** A Job's plot for determining the binding stoichiometry between MPF and  $\text{Ln}^{3+}$  (the total concentration of MPF and  $\text{Ln}^{3+}$  ( $\text{Eu}^{3+}/\text{Tb}^{3+}=7:3$ ) was 1 mM).

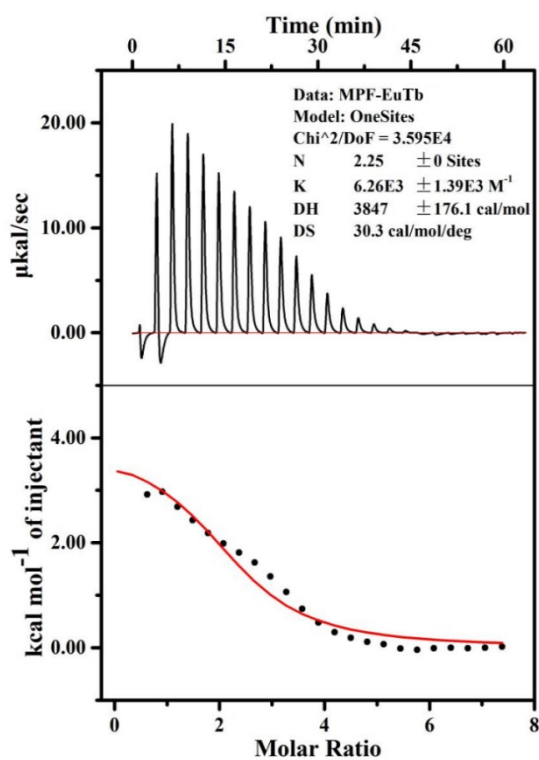

**Fig. S14** Microcalorimetric titration of MPF with  $\text{Eu}^{3+}$  and  $\text{Tb}^{3+}$  in water at 298.15 K. (Top) Raw ITC data for 25 sequential injections (10  $\mu\text{L}$  per injection) of MPF solution (10.0 mM) into  $\text{Eu}^{3+}/\text{Tb}^{3+}$  (7:3) mixing solution (0.5 mM). (Bottom) Net reaction heat obtained from the integration of the calorimetric traces.

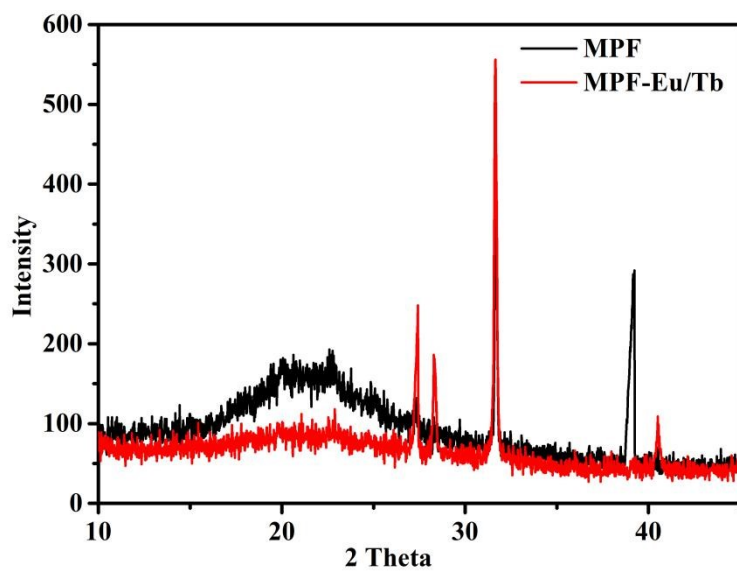

Fig. S15 XRD patterns of MPF and MPF-Eu<sub>0.7</sub>/Tb<sub>0.3</sub> xerogels.

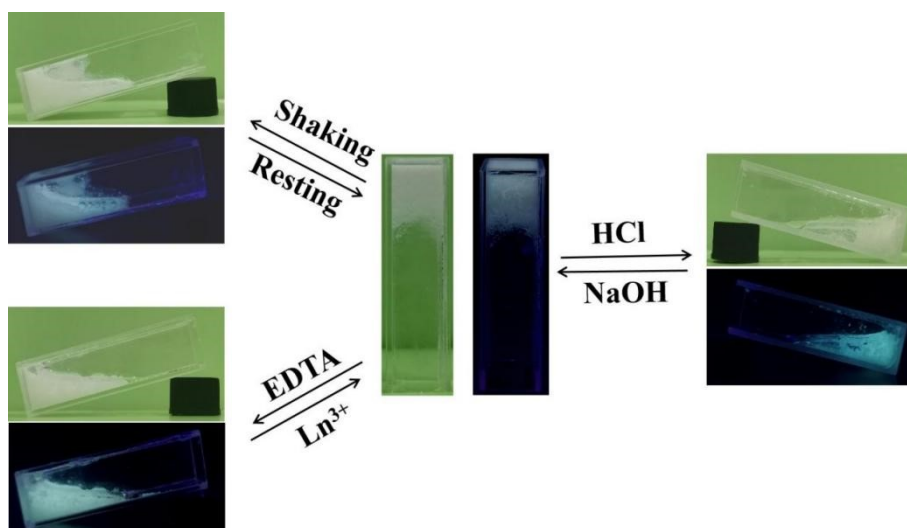

Fig. S16 The photos of WLE hydrogel MPF-Eu<sub>0.7</sub>/Tb<sub>0.3</sub> responsive for various stimuli.

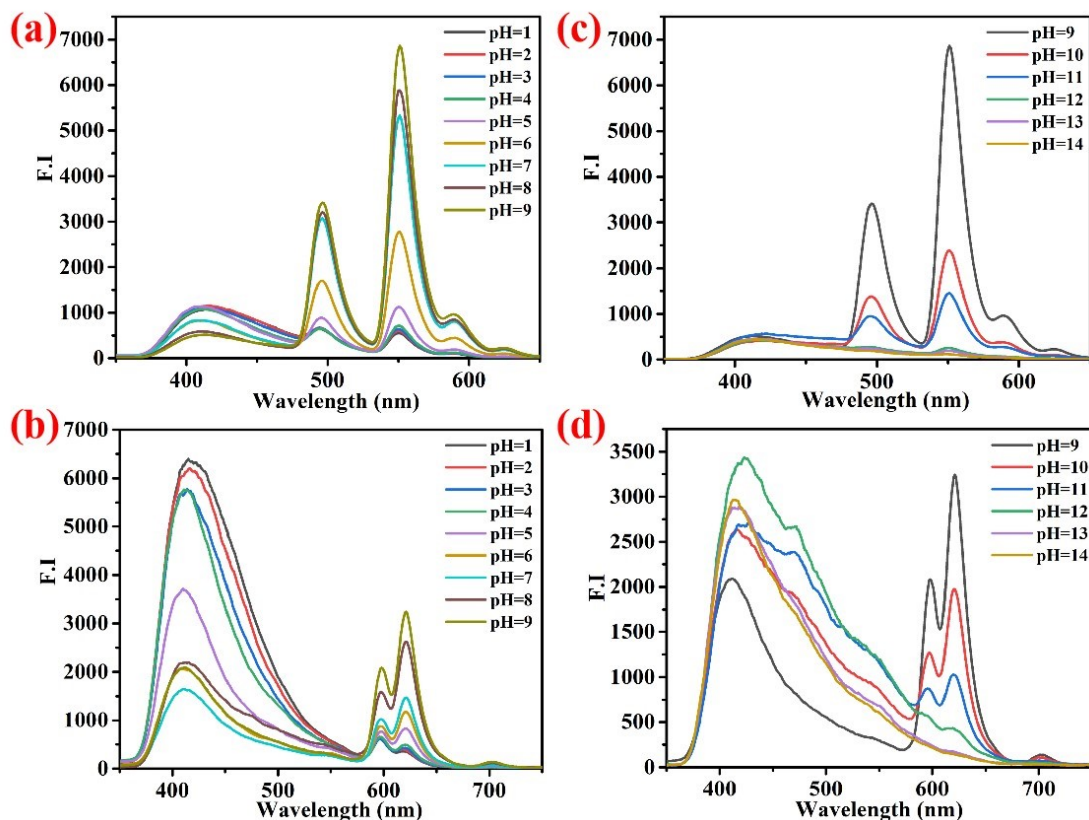

**Fig. S17** The fluorescence spectra of diluted MPF-Tb (a)(c) and MPF-Eu (b)(d) metallohydrogels at different pH values.

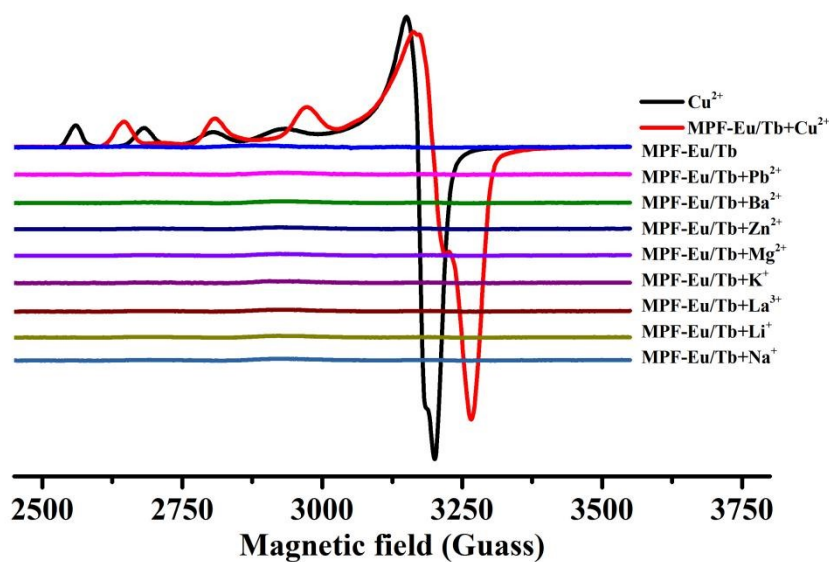

**Fig. S18** EPR spectra of  $\text{Cu}^{2+}$ , MPF-Eu/Tb, MPF-Eu/Tb +  $\text{Cu}^{2+}$ , MPF-Eu/Tb + other metal ions ( $\text{Pb}^{2+}$ ,  $\text{Ba}^{2+}$ ,  $\text{Zn}^{2+}$ ,  $\text{Mg}^{2+}$ ,  $\text{K}^+$ ,  $\text{La}^{3+}$ ,  $\text{Li}^+$ ,  $\text{Na}^+$ ). The spectra were measured at 100 K, with a frequency of 9.238 GHz, microwave power of 1 mW, and modulation amplitude of 3.0 G.

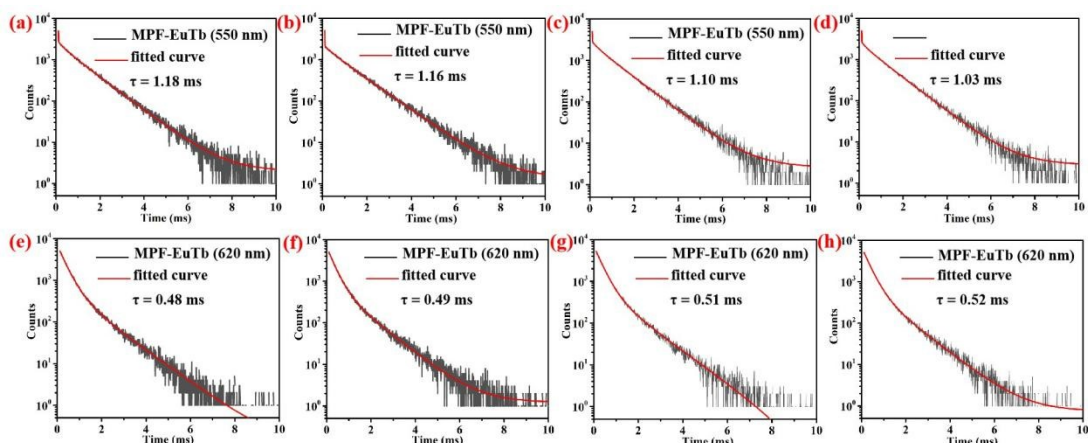

**Fig. S19** Fluorescent decay curves of MPF-Eu<sub>0.7</sub>/Tb<sub>0.3</sub> xerogel with emission wavelength 550 nm and 620 nm at different temperature (273 K (a,e), 298 K (b,f), 313 K (c,g), 333 K (d,h)) ( $\lambda_{\text{ex}} = 295$  nm).

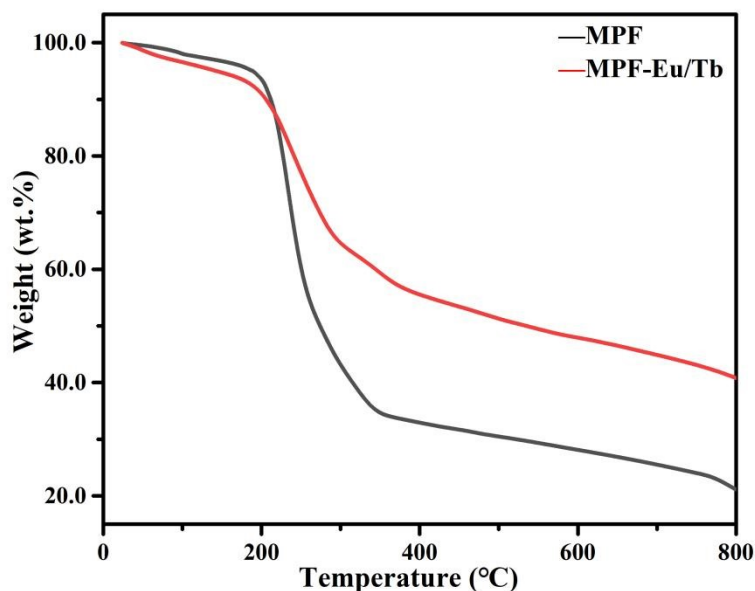

**Fig. S20** Thermogravimetric analysis (TGA) thermogram of MPF and MPF-Eu<sub>0.7</sub>/Tb<sub>0.3</sub>. Thermal analysis system in a dynamic nitrogen atmosphere (heating rate: 10°C/min, MPF and MPF-Eu/Tb, mass 1-3 mg, temperature range from room temperature up to 800°C).

The thermogravimetric analysis (TGA) curve (Fig. S20) of MPF and MPF-Eu/Tb xerogels showed that these gels proceeded in three stages. The similar mass loss about 8% at the first stage (25°C-200°C) was due to the loss of absorbed water. At the second stage (25°C-200°C), the weight loss of MPF and MPF-Eu/Tb was 58% and 33%, respectively. When the temperature was 800°C, the residual mass of MPF was 21.1%, while that of Eu<sub>0.7</sub>/Tb<sub>0.3</sub> was 40.8%. These results indicated that the thermal stability of WLE hydrogel was better than MPF gel, which also showed that this material was reliable in the general environment.

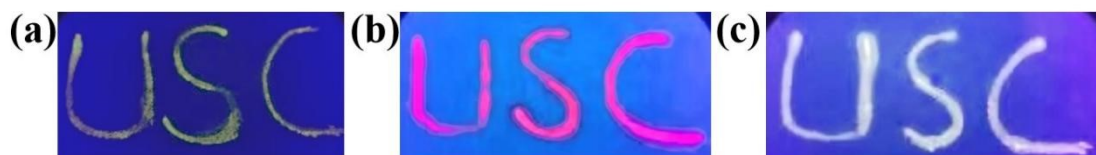

**Fig. S21** Digital images of the handwritten symbols of “USC” using MPF-Eu, MPF-Tb, and MPF-Eu<sub>0.7</sub>/Tb<sub>0.3</sub> gel as luminescence ink read under 254 nm UV irradiation.
